1 Comparative study of four SARS-CoV-2 Nucleic Acid Amplification Test (NAAT) platforms  
2 demonstrates that ID NOW performance is impaired substantially by patient and specimen type.

3

4 Paul R. Lephart <sup>a#</sup>, Michael Bachman <sup>a</sup>, William LeBar <sup>a</sup>, Scott McClellan <sup>a</sup>, Karen Barron <sup>a</sup>, Lee  
5 Schroeder <sup>a</sup>, Duane W. Newton <sup>a</sup>

6

7 <sup>a</sup> Department of Pathology, University of Michigan Medical School, Ann Arbor, Michigan,  
8 USA.

9

10 Running Head: Multiplatform comparative study of SARS-CoV-2 NAATs

11

12 #Address correspondence to Paul R. Lephart, [plephart@umich.edu](mailto:plephart@umich.edu)

13

## 14 **Abstract**

15           The advent of the COVID-19 pandemic in the United States created a unique situation  
16 where multiple molecular diagnostic assays with various indications for use in the detection of  
17 SARS-CoV-2 rapidly received Emergency Use Authorization by the FDA, were validated by  
18 laboratories and utilized clinically, all within a period of a few weeks. We compared the  
19 performance of four of these assays that were being evaluated for use at our institution: Abbott  
20 RealTime m2000 SARS-CoV-2 Assay, DiaSorin Simplexa COVID-19 Direct, Cepheid Xpert  
21 Xpress SARS-CoV-2 and Abbott ID NOW COVID-19. Nasopharyngeal and nasal specimens  
22 were collected from 88 ED and hospital-admitted patients and tested by the four methods in  
23 parallel to compare performance. ID NOW performance stood out as significantly worse than  
24 the other three assays despite demonstrating comparable analytic sensitivity. Further study  
25 determined that the use of a foam nasal swab compared to a nylon flocked nasopharyngeal swab,  
26 as well as use in a population chronically vs. acutely positive for SARS-CoV-2, were significant  
27 factors in the poor comparable performance.

## 28 **Introduction**

29           The rapid onset of COVID-19 in the United States resulted in an accelerated pace of both  
30 SARS-CoV-2 nucleic acid amplification test (NAAT) development and FDA Emergency Use  
31 Authorization (EUA) approvals. Clinical microbiology laboratories that typically would take  
32 weeks to evaluate and verify performance characteristics for a FDA approved diagnostic test had  
33 little choice but to perform abbreviated validation and/or verification studies of assays,  
34 benchmarked against limited FDA EUA performance data, in a matter of days. The sheer  
35 volume of COVID-19 test requests from different patient populations, different specimen types,

36 and with different turnaround time needs demanded that laboratories implement more than one  
37 type of NAAT to respond to the crisis.

38 SARS-CoV-2 testing in our laboratory began with the CDC EUA assay performed on  
39 Abbott m2000, but due to that assay's significant throughput constraints (24 specimens in 8  
40 hours), we quickly verified and switched to the Abbott RealTime SARS-CoV-2 EUA Assay  
41 (m2000) once released (94 specimens in ~8 hours). Although this assay provided capacity for  
42 our outpatient testing needs, we also verified the DiaSorin Simplexa COVID-19 Direct  
43 (Simplexa) assay, capable of resulting 8 specimens in 90 minutes, and used this assay as a rapid  
44 turn-around time (TAT) option for our inpatient and emergency department (ED) populations.  
45 Within a few weeks, additional SARS-CoV-2 NAAT options emerged that were specifically  
46 designed for rapid testing of patients in the point of care setting: the Cepheid Xpert Xpress  
47 SARS-CoV-2 (Xpert) assay, which could provide results in 45 minutes, and the Abbott ID NOW  
48 COVID-19 (ID NOW) assay, ultimately approved for direct nasal, nasopharyngeal and throat  
49 swab testing only, with results in 5-15 minutes.

50 In the absence of clinical trials and a gold standard for COVID-19 diagnosis, the clinical  
51 performance of SARS-CoV-2 assays is unclear. Anecdotal claims of poor NAAT performance  
52 exist in the lay press, and limited studies have shown variable performance of rapid POC tests  
53 (1-9). As a surrogate for a gold standard, a composite reference standard (CRS) can be used to  
54 determine the consensus of comparable assays and identify outlier assays in terms of clinical  
55 performance (10). Using this approach, our goal was to evaluate the performance—in parallel—  
56 of three NAATs from nasopharyngeal (NP) swabs in M4-RT viral transport medium (VTM)  
57 (m2000, Xpert, Simplexa) and an NAAT assay performed directly from a nasal swab (ID NOW).

58

## 59 **Methods**

### 60 Accuracy Study Design

61 From 4/22 – 5/5/2020, specimens were collected from 88 ED and hospital admitted  
62 patients and tested for SARS-CoV-2 on the RealTime m2000 SARS-CoV-2 Assay (Abbott  
63 Molecular, Des Plaines, IL), Simplexa™ COVID-19 Direct (DiaSorin, Cypress, CA), Xpert®  
64 Xpress SARS-CoV-2 (Cepheid, Sunnyvale, CA) and ID NOW COVID-19 (Abbott Molecular,  
65 Des Plaines, IL) within 24 hours of collection. Each assay was performed according to  
66 manufacturer's EUA instructions.

67 NP and nasal swabs were collected from 88 patients, of which 75 were patients  
68 presenting in the ED and 13 were from a population of recovering COVID-positive inpatients.  
69 NP specimen collection, transport to the hospital-based core microbiology laboratory in M4-RT  
70 viral transport medium (Thermo Fisher Scientific, San Diego, CA; VTM) and subsequent testing  
71 by Simplexa was performed as a part of routine clinical care. Residual NP specimen in VTM  
72 was stored at 4°C, transported to our offsite main laboratory, and within 24 hours of collection,  
73 used for comparative study testing by m2000 and Xpert assays. At the time of NP swab  
74 collection, nasal swabs were collected in parallel from each of these patients and transported dry  
75 to the offsite main laboratory in a sealed sterile collection bag, stored at 4°C and tested by ID  
76 NOW within 24 hours, consistent with the package insert procedure.

77 In order to determine a percent agreement amongst the methods, we established a  
78 composite reference standard as defined by result agreement of SARS-CoV-2 target in at least 2  
79 of 4 NAAT results. Agreement for each individual assay was compared to this standard.

80

81

## 82 Analytic Limit of Detection Study Design

83 Dilutions were prepared from ZeptoMetrix inactivated SARS-CoV-2 virus ( $1.70 \times 10^5$   
84 TCID<sub>50</sub>/ml) that was internally quantified to  $10^{9.62}$  copies/mL relative to a standard curve of  
85 AccuPlex™ SARS-CoV-2 Reference Material (SeraCare) constructed on the m2000 assay. From  
86 that stock, dilutions were made in VTM (1,042, 521, 260, 130, 65 and 32.5 copies/mL) and  
87 tested on the m2000, Simplexa, and Xpert SARS-CoV-2 assays. A separate set of ZeptoMetrix  
88 dilutions in VTM were made so that when added to the 2.5 ml of elution buffer in the ID NOW  
89 receiver cup, equivalent concentrations were achieved (1,042, 522, 262, 105 and 53 copies/mL).  
90 In this way, the concentrations of viral copies in the ID NOW buffer were equivalent to the VTM  
91 dilutions used for the other three instruments. Five replicates at each dilution were tested.

92

## 93 Results & Discussion

94 Nasal swabs directly tested on the ID NOW assay had 48% positive agreement compared  
95 to the CRS, whereas Simplexa had 88%, m2000 had 96% and Xpert had 100% positive  
96 agreement (Table 1). While the deficit in positive percent agreement (PPA) seen in ID NOW  
97 test results is consistent with other early release studies in the scientific literature ((1-4, 7-9)), it  
98 is surprising given the ID NOW's LOD claim of 125 genome equivalents/mL, which is similar to  
99 the 100 copies/mL claimed by the m2000 method, 250 copies/mL claimed by Xpress and 242  
100 copies/mL claimed by Simplexa. To clarify this apparent discrepancy, a direct assessment of the  
101 analytic sensitivity of all assays in this comparison was performed utilizing dilutions of  
102 inactivated SARS-CoV-2 whole virus (ZeptoMetrix). In this limited LOD study, we found each

103 assay had comparable LODs to the reported LOD data in their package insert, including the LOD  
104 of the ID NOW assay, as shown in Table 2.

105           Similarities in the LODs among the assays suggest that other factors contribute to the  
106 differences in comparative performance when testing clinical specimens. When additional ID  
107 NOW testing was performed on the 25 NP VTM specimens that were positive based on the CRS,  
108 6 additional patients were detected that were negative by nasal swab testing. This suggests that  
109 testing an NP swab in VTM on ID Now may have better performance than a direct nasal swab,  
110 as use of the NP VTM improves the PPA from 48% to 64%. However, testing an NP swab in  
111 VTM was recently removed as an approved source from the original ID NOW package insert  
112 based on concerns about false negatives, whereas a nasal swab is provided as an approved  
113 collection device. The sensitivity issues leading up to that removal may have less been due to  
114 VTM than the quality of a nasal specimen itself when compared to a NP specimen. Further  
115 studies should be conducted directly comparing the performance of direct (not placed in VTM)  
116 NP swabs on the ID NOW to NP swabs in VTM tested by other NAATs.

117           An important variable in our study is that two distinct population groups were analyzed.  
118 Thirteen of the 88 patient specimens collected were from an inpatient population of recovering  
119 COVID positive patients, with a mean time from initial COVID-19 diagnosis of 25.8 days. A  
120 comparison of the m2000 Ct values obtained from m2000 positive samples from inpatients (red)  
121 and ED patients (black) and by ID NOW result is shown in Figure 1. The mean m2000 Ct value  
122 for the ID NOW positive specimens was 14.3 versus a significantly higher mean m2000 Ct value  
123 22.29 (p-value < 0.001) for the ID NOW negative specimens. Inpatients had significantly lower  
124 Ct values as measured by Abbott m2000 Ct (n=9, mean Ct 21.6) than positive specimens  
125 collected from patients presenting at the ED (n=16, mean Ct 16.3, p-value 0.04). As the majority

126 of ID NOW negative/m2000 positive specimens (8 of 12) were from this inpatient population of  
127 low Ct positives, the overall performance of the ID NOW assay was substantially impacted. To  
128 assess test performance in a more typical use case in a POC setting, we reanalyzed percent  
129 agreement for all assays using only ED patients. While still notably lower than the other assays,  
130 the PPA of ID NOW increased from 48 to 69%, whereas performance of the other assays was  
131 nearly identical (Table 1b).

132         This comparative analysis of SARS-CoV-2 NAATs utilizing the m2000, Simplexa, Xpert  
133 and ID NOW assays demonstrated that significant performance deficits were found in the ID  
134 NOW assay when tested in a mixed patient population using both NP and nasal specimens.  
135 Based on a CRS, use of the m2000, Xpert, and Simplexa assays for NP specimens in VTM are  
136 likely to have similar performance in clinical practice and choice of implementation can be made  
137 based on considerations of turnaround time, throughput, work flow and cost. In contrast, despite  
138 the ID NOW assay claiming and demonstrating comparable (differences  $< 1 \log_{10}$ ) analytic LOD  
139 findings to the other assays tested, the lower detection rate of the ID NOW from nasal samples  
140 must be considered when deciding on a use case. When limiting our data set to an acute ED  
141 patient population and comparing results from the same specimen type (NP in VTM),  
142 performance of ID NOW was improved but still demonstrated lower performance compared to  
143 the other assays tested. In situations where the 5-15 minute turn-around time of the ID NOW  
144 provides distinct advantages, it is critical that the most appropriate specimen type, appropriate  
145 patient population and need for more sensitive confirmatory NAAT testing be assessed prior to  
146 use.

147

148

149 Table 1a: Agreement of Four SARS-CoV-2 NAATs relative to the CRS.

|                 | Composite Reference Standard (CRS) |              | Percent Agreement with CRS |      | 95% CI       |
|-----------------|------------------------------------|--------------|----------------------------|------|--------------|
|                 | Detected                           | Not detected |                            |      |              |
| <b>ID NOW</b>   |                                    |              | Positive Agreement =       | 48%  | 0.30 to 0.67 |
| Detected        | 12                                 | 0            | Negative Agreement =       | 100% | 0.94 to 1.0  |
| Not detected    | 13                                 | 63           | Overall Agreement =        | 85%  |              |
| <b>Simplexa</b> |                                    |              | Positive Agreement =       | 88%  | 0.70 to 0.96 |
| Detected        | 22                                 | 0            | Negative Agreement =       | 100% | 0.94 to 1.0  |
| Not detected    | 3                                  | 63           | Overall Agreement =        | 97%  |              |
| <b>m2000</b>    |                                    |              | Positive Agreement =       | 96%  | 0.80 to 1.0  |
| Detected        | 24                                 | 0            | Negative Agreement =       | 100% | 0.94 to 1.0  |
| Not detected    | 1                                  | 61           | Overall Agreement =        | 99%  |              |
|                 |                                    | 2 invalids   |                            |      |              |
| <b>Xpert</b>    |                                    |              | Positive Agreement =       | 100% | 0.87 to 1.0  |
| Detected        | 25                                 | 2            | Negative Agreement =       | 97%  | 0.87 to 0.99 |
| Not detected    | 0                                  | 60           | Overall Agreement =        | 98%  |              |
|                 |                                    | 1 invalid    |                            |      |              |

150

151 Table 1b: Agreement of Four SARS-CoV-2 NAATs relative to the CRS (ED patients only)

|                 | Composite Reference Standard (CRS) |              | Percent Agreement with CRS |      | 95% CI       |
|-----------------|------------------------------------|--------------|----------------------------|------|--------------|
|                 | Detected                           | Not detected |                            |      |              |
| <b>ID NOW</b>   |                                    |              | Positive Agreement =       | 69%  | 0.44 to 0.86 |
| Detected        | 11                                 | 0            | Negative Agreement =       | 100% | 0.94 to 1.0  |
| Not detected    | 5                                  | 59           | Overall Agreement =        | 93%  |              |
| <b>Simplexa</b> |                                    |              | Positive Agreement =       | 88%  | 0.64 to 0.98 |
| Detected        | 14                                 | 0            | Negative Agreement =       | 100% | 0.94 to 1.0  |
| Not detected    | 2                                  | 59           | Overall Agreement =        | 97%  |              |
| <b>m2000</b>    |                                    |              | Positive Agreement =       | 94%  | 0.72 to 1.0  |
| Detected        | 15                                 | 0            | Negative Agreement =       | 100% | 0.94 to 1.0  |
| Not detected    | 1                                  | 57           | Overall Agreement =        | 99%  |              |
|                 |                                    | 2 invalids   |                            |      |              |
| <b>Xpert</b>    |                                    |              | Positive Agreement =       | 100% | 0.81 to 1.0  |
| Detected        | 16                                 | 2            | Negative Agreement =       | 97%  | 0.89 to 0.99 |
| Not detected    | 0                                  | 58           | Overall Agreement =        | 98%  |              |
|                 |                                    | 1 invalid    |                            |      |              |

152



153 Table 2

|          | Study LOD in M4-RT (copies/ml)* | Package insert LOD        | Average Ct at LOD |
|----------|---------------------------------|---------------------------|-------------------|
| m2000    | 32.5                            | 100 copies/ml             | 26.5**            |
| Cepheid  | 65                              | 250 copies/ml             | 36.7 / 39.8       |
| ID NOW   | 262                             | 125 genome equivalents/ml | N/A               |
| Simplexa | 521                             | 242 copies/ml             | 32.6 / 33.0       |

154 \* Defined as lowest dilution in which 5/5 replicates detected.

155 \*\* Reported Ct value for m2000 excludes 10 unread cycles.

156

157

158 Figure 1: ID NOW Result by m2000 cycle time. Data points depicted in red indicate inpatient  
 159 specimens and black are ED specimens.

160

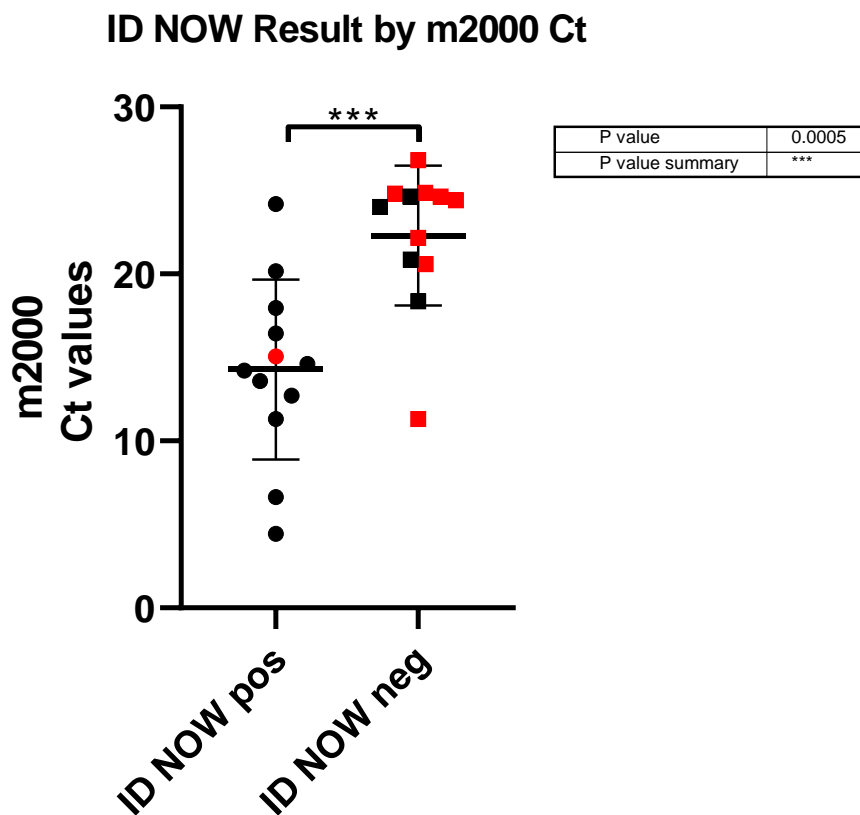

161

162

163 **References**

- 164 1. Harrington A, Cox B, Snowdon J, Bakst J, Ley E, Grajales P, Maggiore J, Kahn S. 2020. Comparison  
165 of Abbott ID Now and Abbott m2000 methods for the detection of SARS-CoV-2 from  
166 nasopharyngeal and nasal swabs from symptomatic patients. *J Clin Microbiol*  
167 doi:10.1128/jcm.00798-20.
- 168 2. Mitchell SL, George KS. 2020. Evaluation of the COVID19 ID NOW EUA assay. *J Clin Virol*  
169 128:104429.
- 170 3. Rhoads DD, Cherian SS, Roman K, Stempak LM, Schmotzer CL, Sadri N. 2020. Comparison of  
171 Abbott ID Now, Diasorin Simplexa, and CDC FDA EUA methods for the detection of SARS-CoV-2  
172 from nasopharyngeal and nasal swabs from individuals diagnosed with COVID-19. *J Clin*  
173 *Microbiol* doi:10.1128/jcm.00760-20.
- 174 4. Smithgall MC, Scherberkova I, Whittier S, Green DA. 2020. Comparison of Cepheid Xpert Xpress  
175 and Abbott ID Now to Roche cobas for the Rapid Detection of SARS-CoV-2. *J Clin Virol*  
176 128:104428.
- 177 5. Visseaux B, Le Hingrat Q, Collin G, Bouzid D, Lebourgeois S, Le Pluart D, Deconinck L, Lescure FX,  
178 Lucet JC, Bouadma L, Timsit JF, Descamps D, Yazdanpanah Y, Casalino E, Houhou-Fidouh N.  
179 2020. Evaluation of the QIAstat-Dx Respiratory SARS-CoV-2 Panel, the first rapid multiplex PCR  
180 commercial assay for SARS-CoV-2 detection. *J Clin Microbiol* doi:10.1128/jcm.00630-20.
- 181 6. Wolters F, van de Bovenkamp J, van den Bosch B, van den Brink S, Broeders M, Chung NH, Favié  
182 B, Goderski G, Kuijpers J, Overdevest I, Rahamat-Langedoen J, Wijsman L, Melchers WJ, Meijer  
183 A. 2020. Multi-center evaluation of cepheid xpert® xpress SARS-CoV-2 point-of-care test during  
184 the SARS-CoV-2 pandemic. *J Clin Virol* 128:104426.
- 185 7. Zhen W, Smith E, Manji R, Schron D, Berry GJ. 2020. Clinical Evaluation of Three Sample-To-  
186 Answer Platforms for the Detection of SARS-CoV-2. *J Clin Microbiol* doi:10.1128/jcm.00783-20.
- 187 8. Cradic K, Lockhart M, Ozbolt P, Fatica L, Landon L, Lieber M, Yang D, Swickard J, Wongchaowart  
188 N, Fuhrman S, Antonara S. 2020. Clinical Evaluation and Utilization of Multiple Molecular In Vitro  
189 Diagnostic Assays for the Detection of SARS-CoV-2. *Am J Clin Pathol* doi:10.1093/ajcp/aqaa097.
- 190 9. Moore NM, Li H, Schejbal D, Lindsley J, Hayden MK. 2020. Comparison of two commercial  
191 molecular tests and a laboratory-developed modification of the CDC 2019-nCoV RT-PCR assay  
192 for the detection of SARS-CoV-2. *J Clin Microbiol* doi:10.1128/jcm.00938-20.
- 193 10. Schiaffino S, Tritella S, Cozzi A, Carriero S, Blandi L, Ferraris L, Sardanelli F. 2020. Diagnostic  
194 Performance of Chest X-Ray for COVID-19 Pneumonia During the SARS-CoV-2 Pandemic in  
195 Lombardy, Italy. *J Thorac Imaging* doi:10.1097/rti.0000000000000533.

196
